# Supplementary material for: A 2-Deoxyglucose-Resistant Mutant of Saccharomyces cerevisiae Shows Enhanced Maltose Fermentative Ability by the Activation of MAL Genes
Source: MDPI journal article supplement (doi:10.3390/foods7040052), 2018-04-01
Supplement: s1 [file s1]

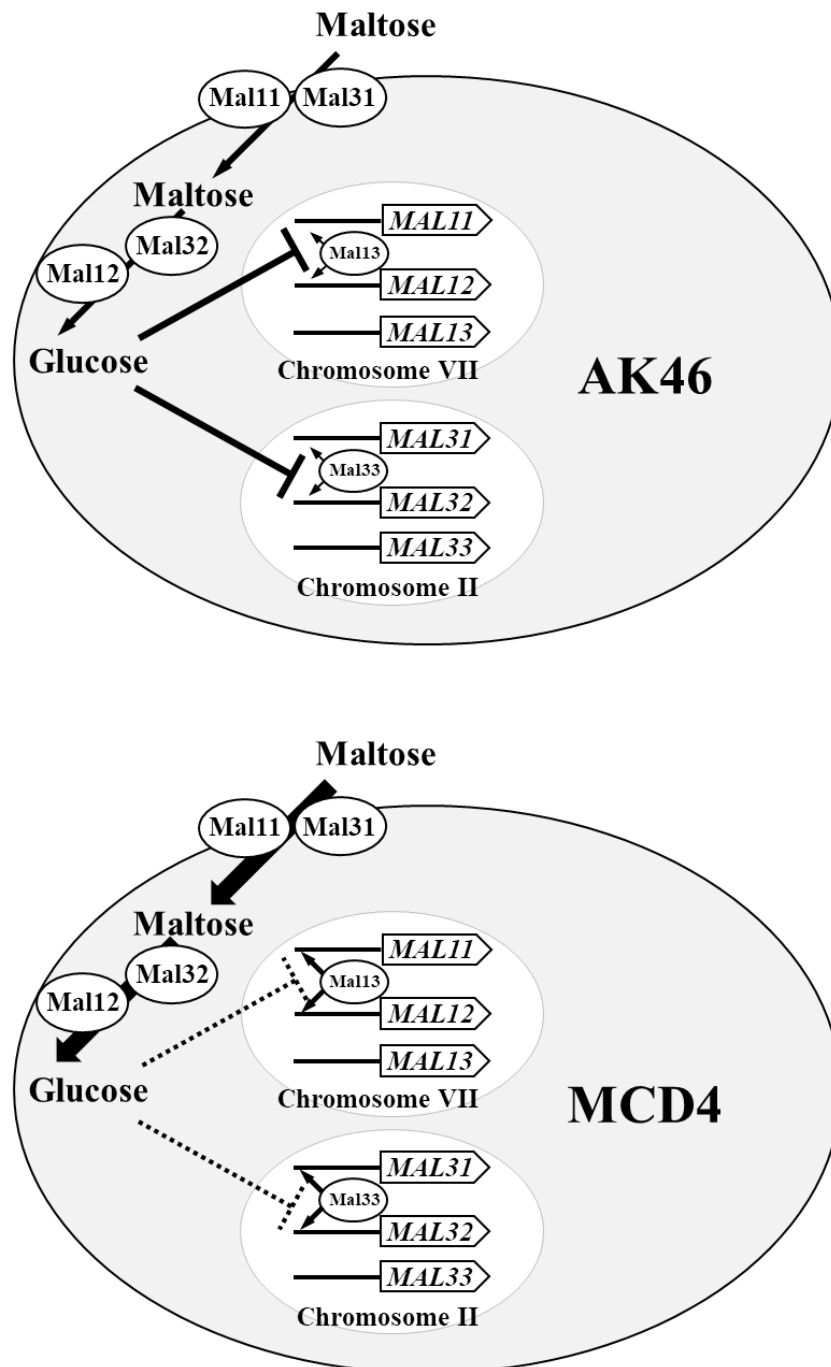

**Figure S1.** The functional roles of 6 *MAL* genes and Mal proteins in *S. cerevisiae* AK46 and MCD4 on maltose metabolism. Mal11 and Mal13, maltose permease; Mal12 and Mal32,  $\alpha$ -glucosidase; Mal13 and Mal33, *MAL* gene activator. Thick arrows show the enhancement of gene transcription or function of Mal proteins. Broken lines indicate the release from catabolite repression.
